# Supplementary material
Source: PubMed Central journal article supplement (PMC2903794)
Supplement: supp_M001545_jlr.M001545-1.pdf [file supp_M001545_jlr.M001545-1.pdf]

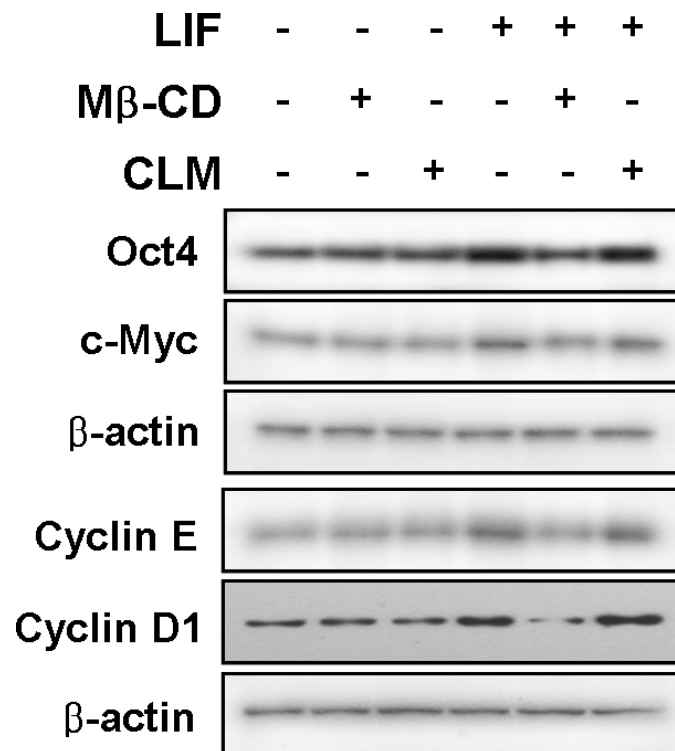

**Suppl 1.** Effect of M $\beta$ -CD and cholesterol-loaded M $\beta$ -CD (CLM) in LIF-induced stem cell pluripotency markers and cell proliferation markers. Mouse ES cells were preincubated for 1 h with 10 mM M $\beta$ -CD or CLM prior to a 24 h LIF treatment, and Oct4, c-Myc, cyclin E, and cyclin D1 protein expression was detected. Each example shown is representative of four independent experiments.

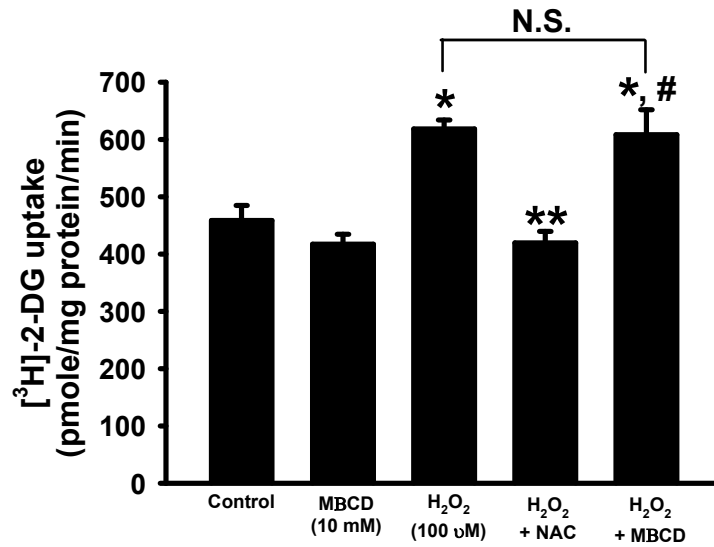

**Suppl 2.** Effect of M $\beta$ -CD on hydrogen peroxide-induced increase in [<sup>3</sup>H]-2-deoxyglucose (2-DG) uptake. The mouse ES cells were pretreated with M $\beta$ CD (10 mM) or N-acetyl-L-cysteine (NAC, 1  $\mu$ M) for 1 h before 4h of the H<sub>2</sub>O<sub>2</sub> (100 uM) treatment. The values are reported as the mean  $\pm$  S.E. of 3 independent experiments with triplicate dishes. \**P* < 0.05 vs. Control, \*\**P* < 0.05 vs. H<sub>2</sub>O<sub>2</sub> alone, #*P* < 0.05 vs. MBCD alone. [N.S.; Not Significant].
